# Supplementary material for: Association between Media Use and Bedtime Delays in Young Children: An Adjunct Study of the Japan Environment and Children’s Study
Source: MDPI journal article supplement (doi:10.3390/ijerph19159464), 2022-08-02
Supplement: s1 [file s1]

Table S1 Comparison of characteristics of children and parents between eligible respondents to the current study and other JECS participant mothers

|                                           | Eligible respondents |       | Other mothers |       | p-value |
|-------------------------------------------|----------------------|-------|---------------|-------|---------|
|                                           | n                    | %     | n             | %     |         |
| Number                                    | 1,837                |       | 3,231         |       |         |
| <i>Basic characteristics</i>              |                      |       |               |       |         |
| Child's sex                               |                      |       |               |       |         |
| Male                                      | 940                  | 51.2  | 1662          | 51.4  | 0.861   |
| Female                                    | 897                  | 48.8  | 1569          | 48.6  |         |
| Birth year                                |                      |       |               |       |         |
| 2011                                      | 167                  | 9.1   | 317           | 9.8   | 0.090   |
| 2012                                      | 629                  | 34.2  | 1,112         | 34.4  |         |
| 2013                                      | 617                  | 33.6  | 1,149         | 35.6  |         |
| 2014                                      | 424                  | 23.1  | 653           | 20.2  |         |
| Elder sibling                             |                      |       |               |       |         |
| No                                        | 829                  | 45.1  | 1,212         | 37.5  | 0.854   |
| Yes                                       | 974                  | 53.0  | 1,406         | 43.5  |         |
| Missing                                   | 34                   | 1.9   | 613           | 19.0  |         |
| Mother's age at delivery, year mean (SD)  | 31.9                 | (4.7) | 30.9          | (5.1) | <0.001  |
| Missing                                   | 0                    | 0     | 1             | 0.03  |         |
| Father's age at 6 months, years mean (SD) | 34.3                 | (5.9) | 33.6          | (6.0) | <0.001  |
| Missing                                   | 55                   | 3.0   | 372           | 11.5  |         |
| Mother's education                        |                      |       |               |       |         |
| Junior or senior high                     | 559                  | 30.4  | 1,226         | 37.9  | <0.001  |
| Junior college or vocational              | 801                  | 43.6  | 1,215         | 37.6  |         |
| Undergraduate or above                    | 454                  | 24.7  | 541           | 16.7  |         |
| Missing                                   | 23                   | 1.3   | 249           | 7.7   |         |
| Father's education                        |                      |       |               |       |         |
| Junior or senior high                     | 712                  | 38.8  | 1,458         | 45.1  | <0.001  |
| Junior college or vocational              | 444                  | 24.2  | 712           | 22.0  |         |
| Undergraduate or above                    | 656                  | 35.7  | 792           | 24.5  |         |
| Missing                                   | 25                   | 1.4   | 269           | 8.3   |         |
| Household income, million Japanese Yen    |                      |       |               |       |         |
| <4                                        | 552                  | 30.0  | 1,081         | 33.5  | <0.001  |
| 4 to <6                                   | 631                  | 34.3  | 985           | 30.5  |         |

|                                                                               |       |      |       |      |        |
|-------------------------------------------------------------------------------|-------|------|-------|------|--------|
| ≥6                                                                            | 587   | 32.0 | 798   | 24.7 |        |
| Missing                                                                       | 67    | 3.6  | 367   | 11.4 |        |
| Mother's occupation at the age of 1 year                                      |       |      |       |      |        |
| No                                                                            | 1,037 | 56.5 | 1,599 | 49.5 | 0.737  |
| Yes                                                                           | 760   | 41.4 | 1,197 | 37.0 |        |
| Missing                                                                       | 40    | 2.2  | 435   | 13.5 |        |
| Marital status at the age of 6 months                                         |       |      |       |      |        |
| Married                                                                       | 1,779 | 96.8 | 2,837 | 87.8 | 0.231  |
| Single                                                                        | 29    | 1.6  | 61    | 1.9  |        |
| Missing                                                                       | 29    | 1.6  | 333   | 10.3 |        |
| <i>Mother's media use while with her child at the age of 3 years, per day</i> |       |      |       |      |        |
| No                                                                            | 226   | 12.3 | 322   | 10.0 | 0.007  |
| < 1 hour                                                                      | 1,153 | 62.8 | 1,508 | 46.7 |        |
| 1 to < 2 hours                                                                | 318   | 17.3 | 504   | 15.6 |        |
| ≥ 2 hours                                                                     | 89    | 4.8  | 171   | 5.3  |        |
| Missing                                                                       | 51    | 2.8  | 726   | 22.5 |        |
| <i>Child's media use at the age of 3 years, per day</i>                       |       |      |       |      |        |
| No                                                                            | 910   | 49.5 | 1,125 | 34.8 | <0.001 |
| < 1 hour                                                                      | 704   | 38.3 | 1,069 | 33.1 |        |
| 1 to < 2 hours                                                                | 136   | 7.4  | 231   | 7.1  |        |
| ≥ 2 hours                                                                     | 39    | 2.1  | 84    | 2.6  |        |
| Missing                                                                       | 48    | 2.6  | 722   | 22.3 |        |
| <i>Child's bedtime at the age of 3 years</i>                                  |       |      |       |      |        |
| –19:59                                                                        | 183   | 10.0 | 201   | 6.2  | 0.087  |
| 20:00–20:59                                                                   | 622   | 33.9 | 863   | 26.7 |        |
| 21:00–21:59                                                                   | 763   | 41.5 | 1,128 | 34.9 |        |
| 22:00–22:59                                                                   | 182   | 9.9  | 246   | 7.6  |        |
| 23:00–                                                                        | 29    | 1.6  | 51    | 1.6  |        |
| Missing                                                                       | 58    | 3.2  | 742   | 23.0 |        |

SD, standard deviation
